# Supplementary material for: Association between Polymorphisms in CFH, ARMS2, CFI, and C3 Genes and Response to Anti-VEGF Treatment in Neovascular Age-Related Macular Degeneration
Source: MDPI journal article supplement (doi:10.3390/biomedicines10071658), 2022-07-10
Supplement: s1 [file s1]

**Table S1.** Regulatory effects of the SNPs selected for the study and their effect on gene expression

| SNPs                                                                  | Regulatory effects according to HaploReg, SNPinfo, Regulome DB, VannoPortal |                         |       |                       |                           |                            |                         |                      |                                 |                             | Expression QTLs<br>(GTE <sub>x</sub> )<br>genes/ tissues | Splicing QTLs<br>(GTE <sub>x</sub> )<br>genes/ tissues |
|-----------------------------------------------------------------------|-----------------------------------------------------------------------------|-------------------------|-------|-----------------------|---------------------------|----------------------------|-------------------------|----------------------|---------------------------------|-----------------------------|----------------------------------------------------------|--------------------------------------------------------|
|                                                                       | Prom<br>histone<br>marks                                                    | Enh<br>histone<br>marks | DNase | Altered<br>reg motifs | TF<br>Binding<br>evidence | Rank / Score<br>RegulomeDB | Splicing<br>ESE/<br>ESS | SIFT/<br>CADD        | Reg<br>Score<br>Vanno<br>Portal | Reg<br>Potential<br>SNPinfo |                                                          |                                                        |
| rs10490924<br><i>ARMS2</i><br>missense                                | -                                                                           | -                       | yes   | 15                    | 5                         | 5/0,13                     | –                       | Damaging             | 0.192                           | –                           | ARMS2: 8<br>PLEKHA1: 6<br>HTRA1: 1                       | ARMS2: 1<br>PLEKHA1: 1                                 |
| rs2230199<br><i>C3</i><br>missense                                    | yes                                                                         | yes                     | yes   | 28                    | 29                        | 3a/0,86                    | yes                     | Tolerated            | 0.584                           | 0,33                        | GPR108: 7<br>CTD-3128G10.7: 1                            | -                                                      |
| rs2285714<br><i>CFI</i> /<br><i>PLA2G12A</i><br>downstream<br>variant | -                                                                           | -                       | -     | 10                    | 7                         | 4/0,60                     | yes                     | Likely<br>pathogenic | 0.327                           | 0,36                        | CFI: 1<br>PLA2G12A:23<br>MCUB:1<br>CASP6: 4              | CFI: 33<br>PLA2G12A: 7                                 |
| rs6677604<br><i>CFH</i><br>intron variant                             | -                                                                           | yes                     | yes   | 20                    | 16                        | 5/0,13                     | –                       | –                    | 0.315                           | –                           | CFHR3: 27<br>CFHR1: 18<br>CFHR4: 1<br>ZBTB41: 1          | CFH: 12<br>CFHR1: 3                                    |
| rs800292<br><i>CFH</i><br>missense                                    | -                                                                           | -                       | -     | 10                    | -                         | 7/0,18                     | –                       | Tolerated/           | 0.156                           | 0,26                        | CFH: 8<br>KCNT: 5<br>CFHR3: 5<br>CFHR1: 1<br>CFHR4: 1    | CFH: 3<br>CFHR2: 1<br>CFHR1: 1<br>F13B: 1              |

CADD - Combined Annotation Dependent Depletion tool; DNase – DNase hypersensitive regions; Enh – Enhancer; ESE - Exonic Splicing Enhancer, ESS – Exonic Splicing Silencer; Prom – Promoter; Reg – regulatory; TF - Transcript Factor.

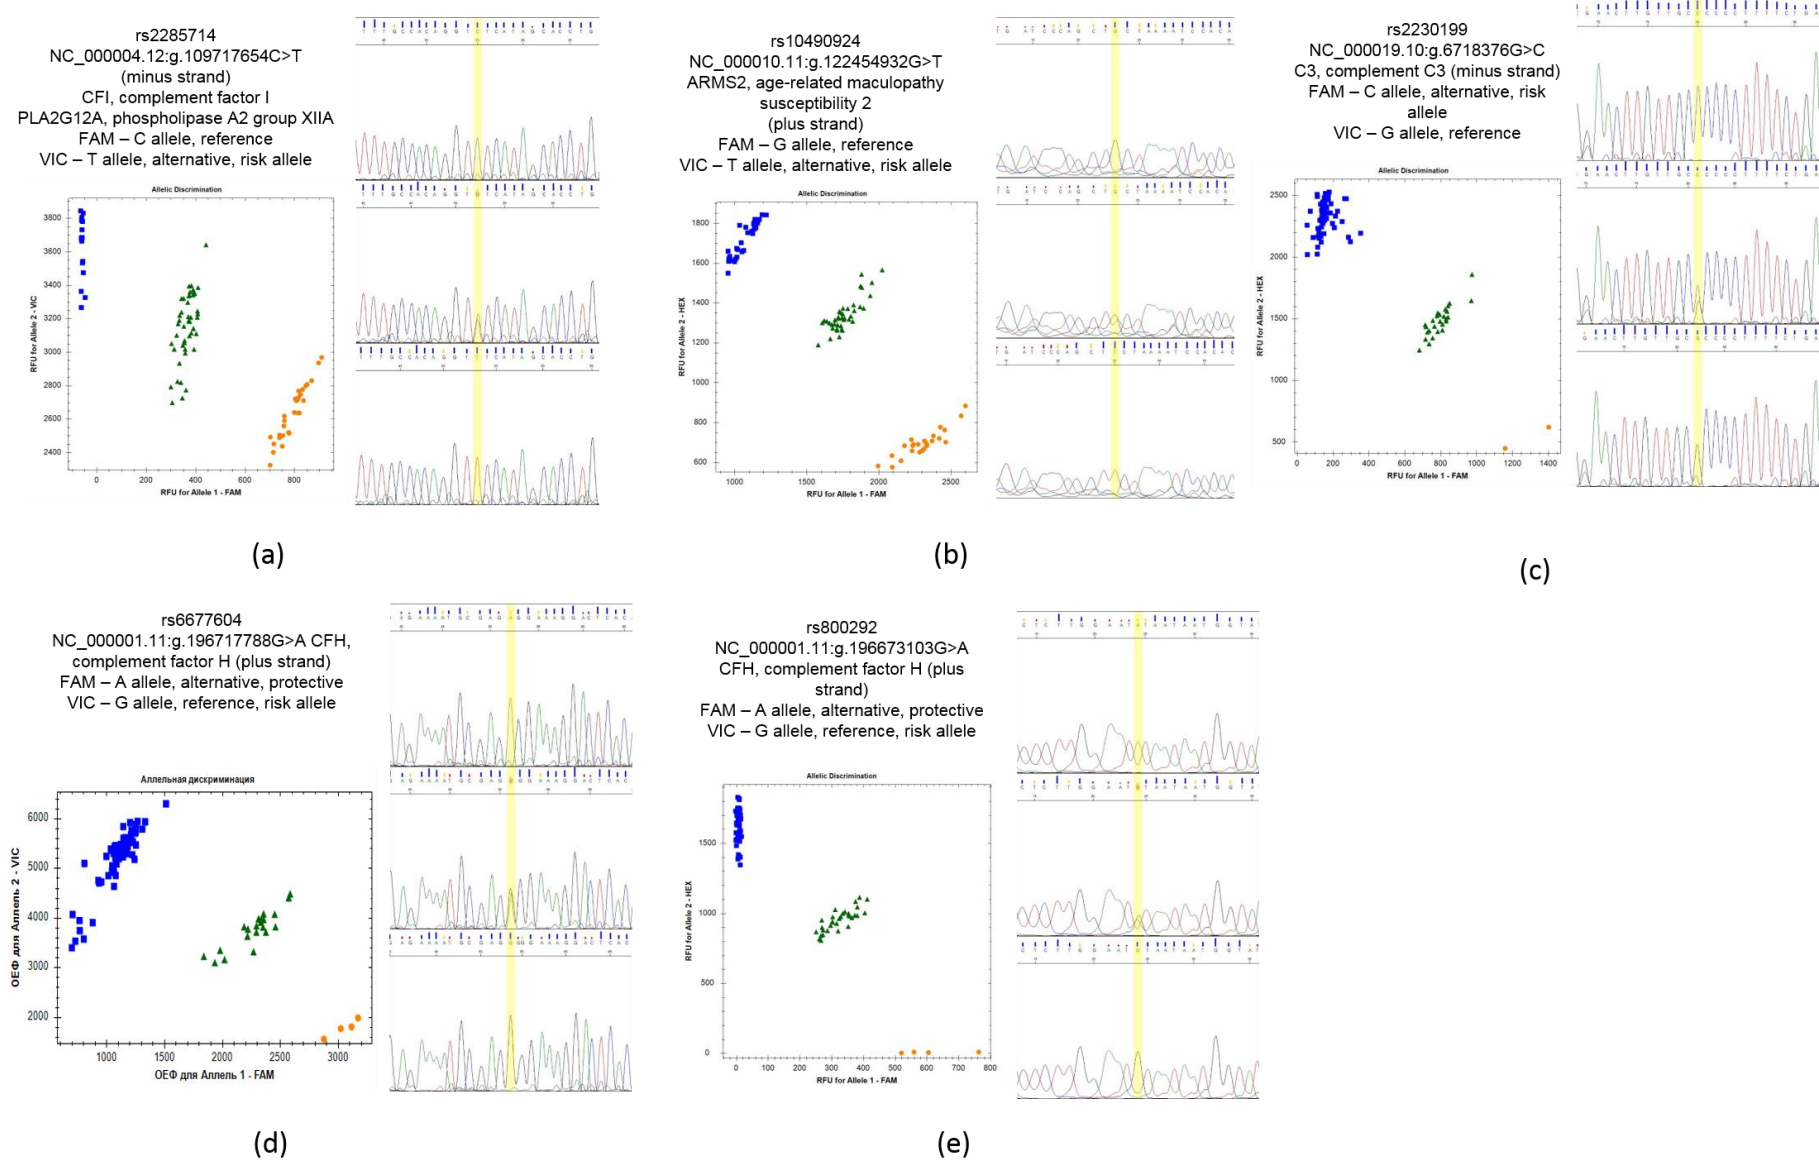

**Figure S1.** Allelic discrimination and Sanger verification results of rs2285714 (a), rs10490924 (b), rs2230199 (c), rs6677604 (d), rs800292 (e).
